# Supplementary material
Source: publisher site journal article supplement (https://www.spandidos-publications.com/5519/downloadSupplementary)
Supplement: Supplementary file [file downloadSupplementary]

Table SI. Top 10 significant terms with regard to virus infection in GO and KEGG pathways.

| Category                | Term                                                          | Number     | P-value                |
|-------------------------|---------------------------------------------------------------|------------|------------------------|
| GO - biological process | Response to virus                                             | GO:0009615 | 2.03x10 <sup>-19</sup> |
|                         | Defense response to virus                                     | GO:0051607 | 3.42x10 <sup>-19</sup> |
| GO - molecular function | Double-stranded RNA binding                                   | GO:0003725 | 5.30x10 <sup>-6</sup>  |
|                         | Oxygen binding                                                | GO:0019825 | 1.00x10 <sup>-5</sup>  |
|                         | GTPase activity                                               | GO:0003924 | 3.24x10 <sup>-5</sup>  |
| KEGG                    | Viral protein interaction with cytokine and cytokine receptor | mmu04061   | 4.99x10 <sup>-6</sup>  |
|                         | Measles                                                       | mmu05162   | 2.66x10 <sup>-5</sup>  |
|                         | Hepatitis C                                                   | mmu05160   | 7.58x10 <sup>-5</sup>  |
|                         | Influenza A                                                   | mmu05164   | 1.13x10 <sup>-4</sup>  |
|                         | Epstein-Barr virus infection                                  | mmu05169   | 2.83x10 <sup>-4</sup>  |

---

GO, Gene Ontology; KEGG, Kyoto Encyclopedia of Genes and Genomes.

---
